# Supplementary figures and images for: Computational Analysis of Short Linear Motifs in the Spike Protein of SARS-CoV-2 Variants Provides Possible Clues into the Immune Hijack and Evasion Mechanisms of Omicron Variant
Source: MDPI journal article supplement (doi:10.3390/ijms23158822), 2022-08-08

# Supplementary Figure S1

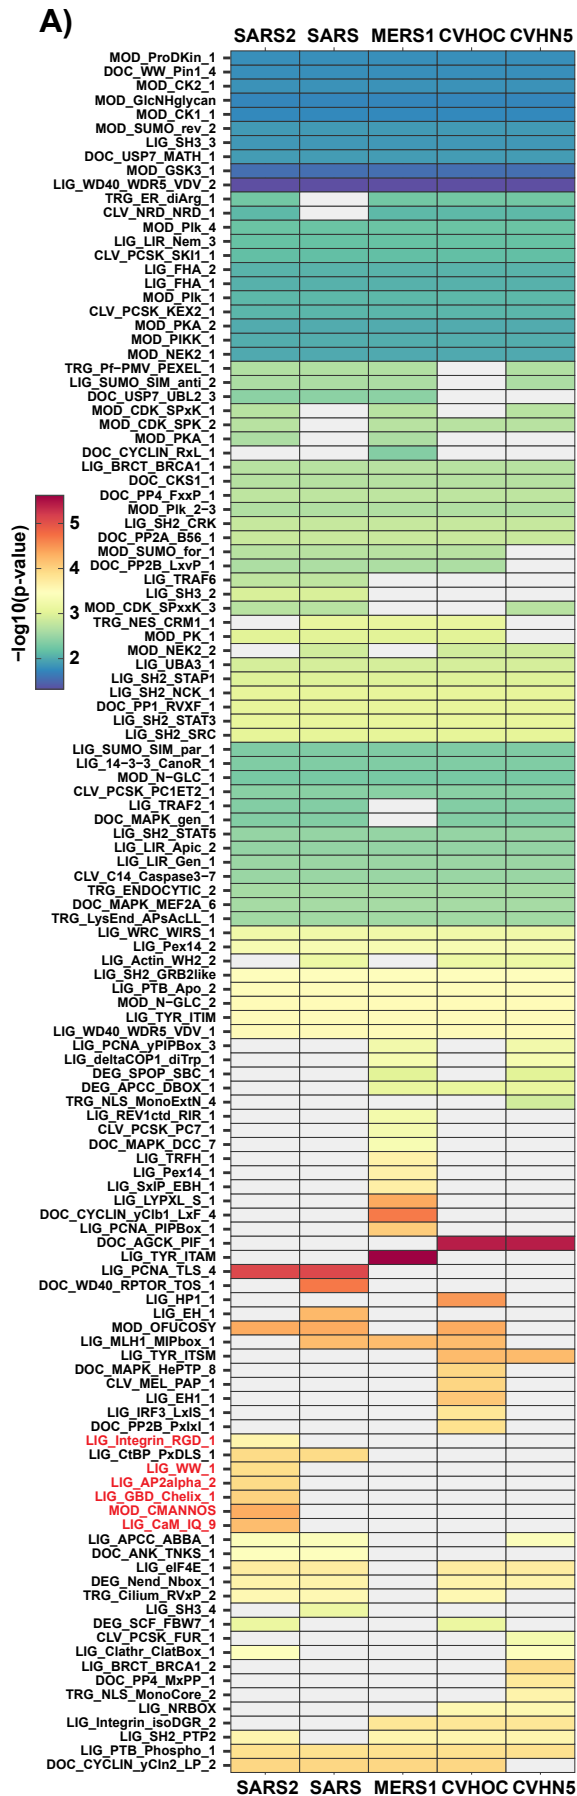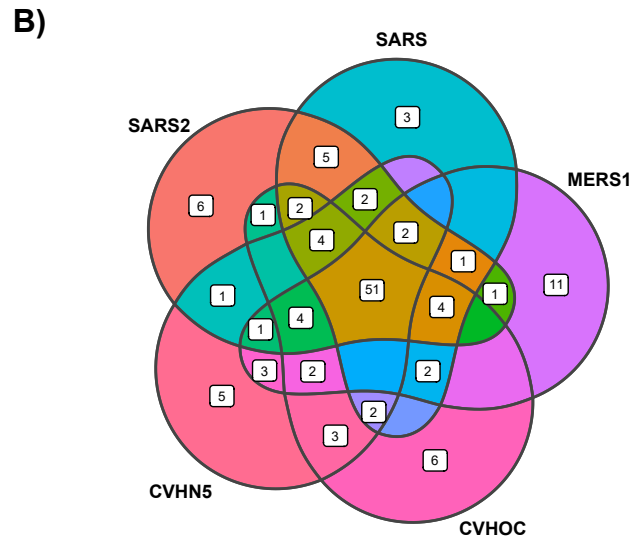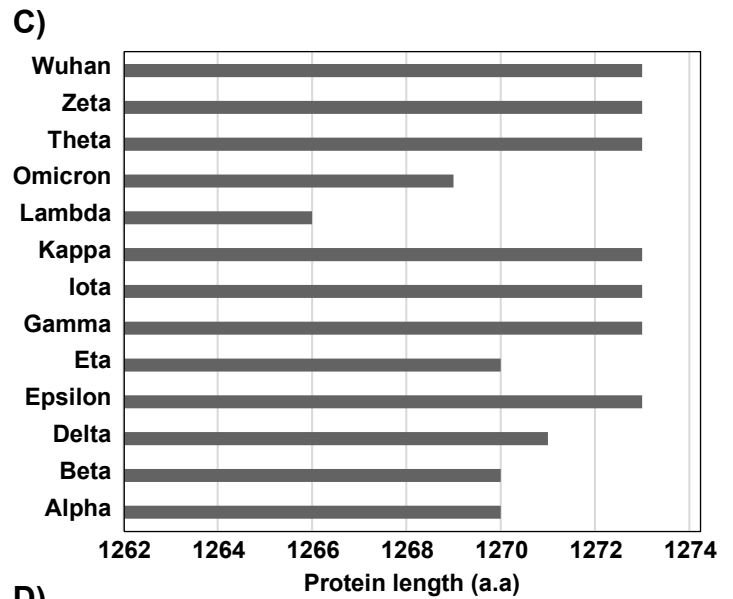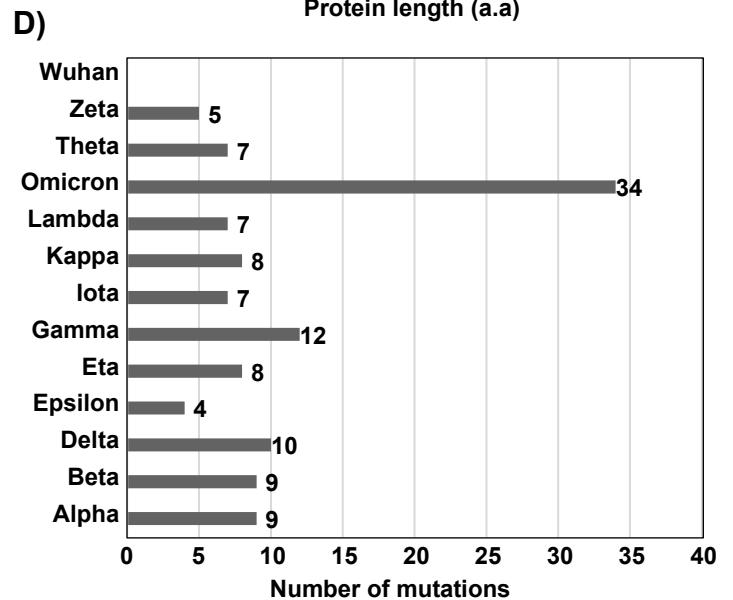

Supplement: s1 [file s1]
